# Supplementary material for: Generation of Marker-Free Transgenic Rice Resistant to Rice Blast Disease Using Ac/Ds Transposon-Mediated Transgene Reintegration System
Source: PubMed Central journal article supplement (PMC8095379; doi:10.3389/fpls.2021.644437), 2021-04-20
Supplement: Table_1.pdf [file Table_1.pdf]

Supplementary Table 1. PCR primers used to screen marker-free *Ds* plants

| Primer pair   | Target sequence | Primers sequence (5' to 3') |
|---------------|-----------------|-----------------------------|
| P-Act-3       | GOI             | GGTAGAATTTGAATCCCTCAGCA     |
| NiR Intron-R  |                 | CTGCACAATTTCAAAGATTGAACC    |
| T3A-R2        | GOI             | AAGAACACAGTAAATTACAAGCAG    |
| NiR Intron-F  |                 | CGAGGTAAGTATGCACTTAAAG      |
| P-Act-R       | GOI             | CTTATACAAATCCCTCTGTATTTAC   |
| Ds3-R         |                 | CGGTAATCGAAAACCGATACGAT     |
| T3A-F         | GOI             | GTTCGTCAAGTTCAATGCATCAG     |
| Ds5-1.8       |                 | ACTTGAGAACATCACATAGTTTAGT   |
| 35S-mCherry-F | T-DNA           | TACAATTACAGGATCCATGGTGAGCA  |
| PlacZ-R       |                 | ATTAGGCACCCCAGGCTTTACACTTT  |
| Ac-Tpase-F    | T-DNA           | GGTTCCCGTCCGATTTTCGAC       |
| Ubi-F         |                 | ATGGCATATGCAGCAGCTATATG     |
| Ubi-R         | T-DNA           | CACTGATATTATTGTAGTACTATAG   |
| GFP2-         |                 | GGTCACGAACTCCAGCAGGAC       |
| Hyg-F         | T-DNA           | ACGGTGTCGTCCATCACAGTTTGCC   |
| Hyg-R         |                 | TTCCGGAAGTGCTTGACATTGGGGA   |
